# Supplementary material for: Fluorescence turn-on and turn-off sensing of pesticides by carbon dot-based sensor
Source: Royal Society of Chemistry journal article supplement (doi:10.1039/c9nj03192h), 2019-01-01
Supplement: c9nj03192h1.pdf [file c9nj03192h1.pdf]

# **Fluorescence Turn-on and Turn-off Sensing of Pesticides by Carbon Dot- Based Sensor**

**Paulami Mandal<sup>\*a</sup>, Dibakar Sahoo<sup>b</sup>, Priyatosh Sarkar<sup>c</sup>, Kaushik Chakraborty<sup>d</sup>,**

**Sukhen Das <sup>\*a</sup>**

<sup>a</sup>*Department of Physics, Jadavpur University, 188, Raja S. C. Mallick Road, Kolkata, West Bengal 700032, India.*

<sup>b</sup>*School of Physics, Sambalpur University, Odisha 768 019, India.*

<sup>c</sup>*Department of Polymer Science and Technology, University of Calcutta, Kolkata-700009*

<sup>d</sup>*Center for Research in NanoScience and Nano Technology, University of Calcutta, Kolkata-700098*

**Supplementary Information**

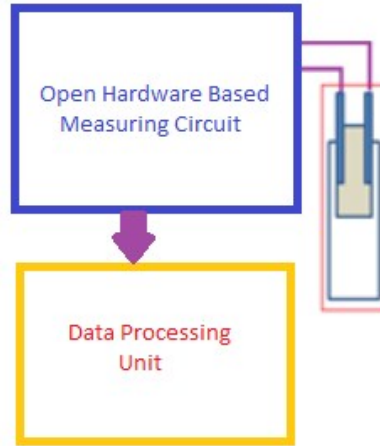

**Figure S1a:** System Schematic and Block Diagram

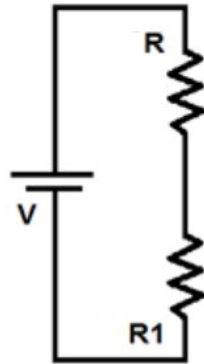

**Figure S1b:** Circuit Schematic

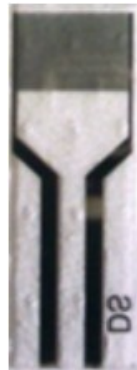

**Figure S1c:** Photo of IDE

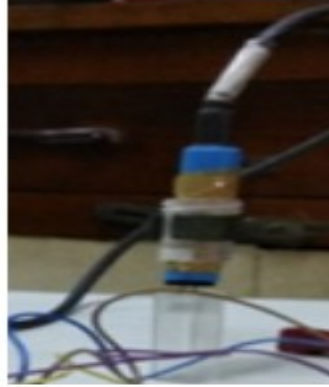

**Figure S1d:** Snapshot of Experimental Setup

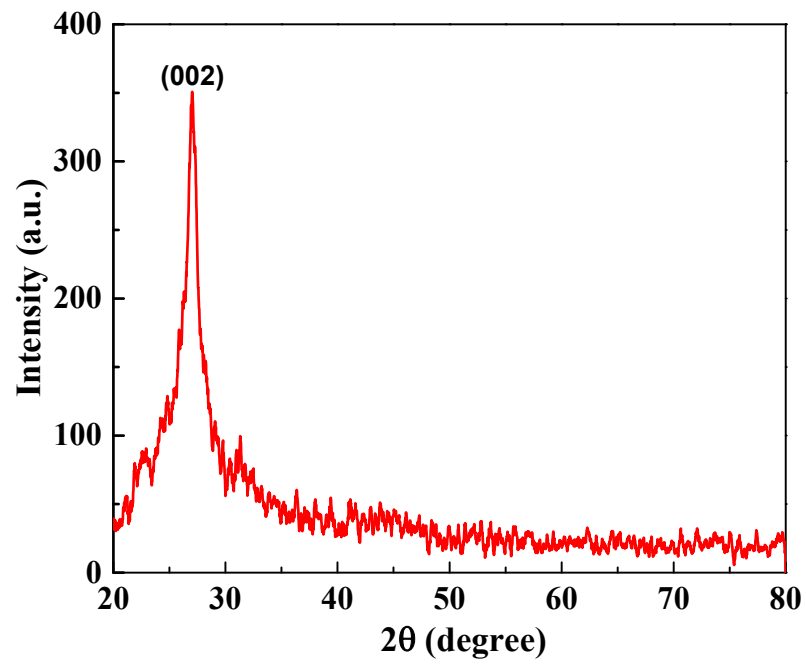

**Figure S2:** XRD pattern of the as-synthesized C-Dots

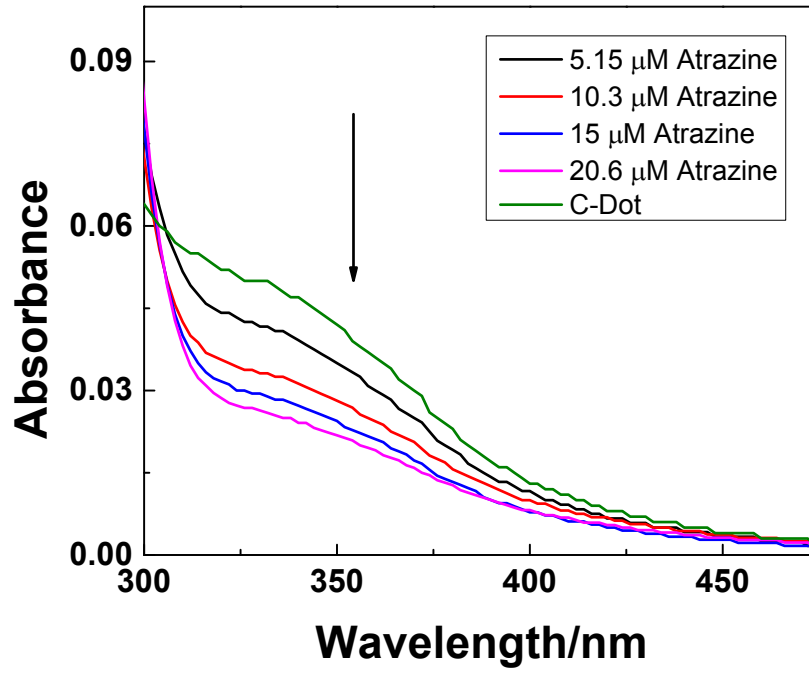

Fig.S3a

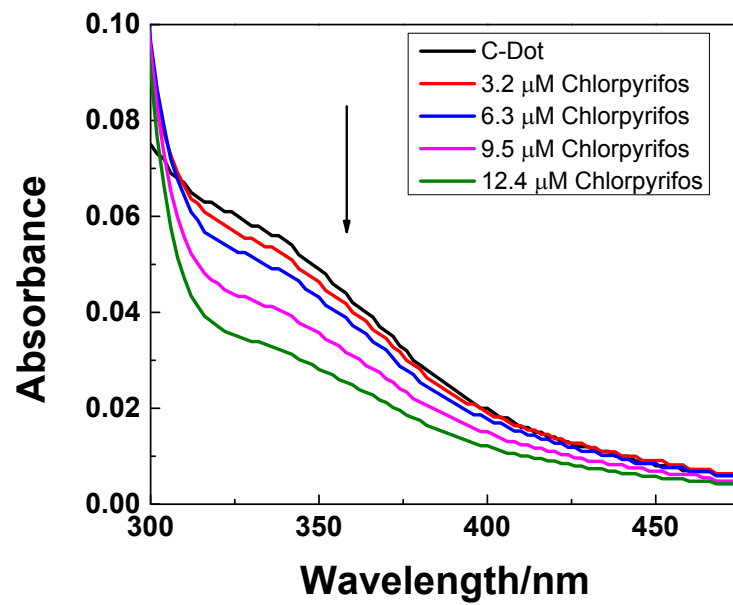

Fig.S3b

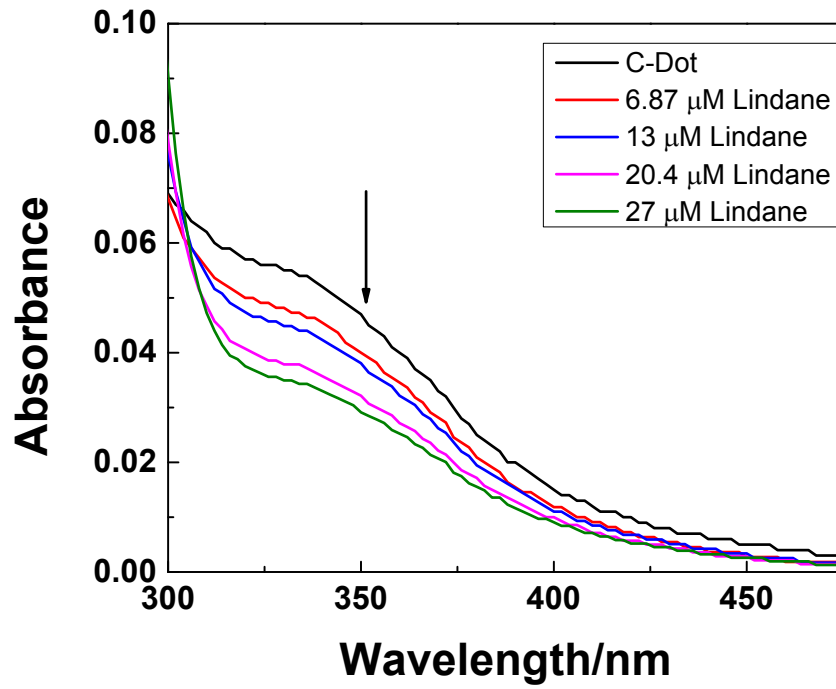

Fig.S3c

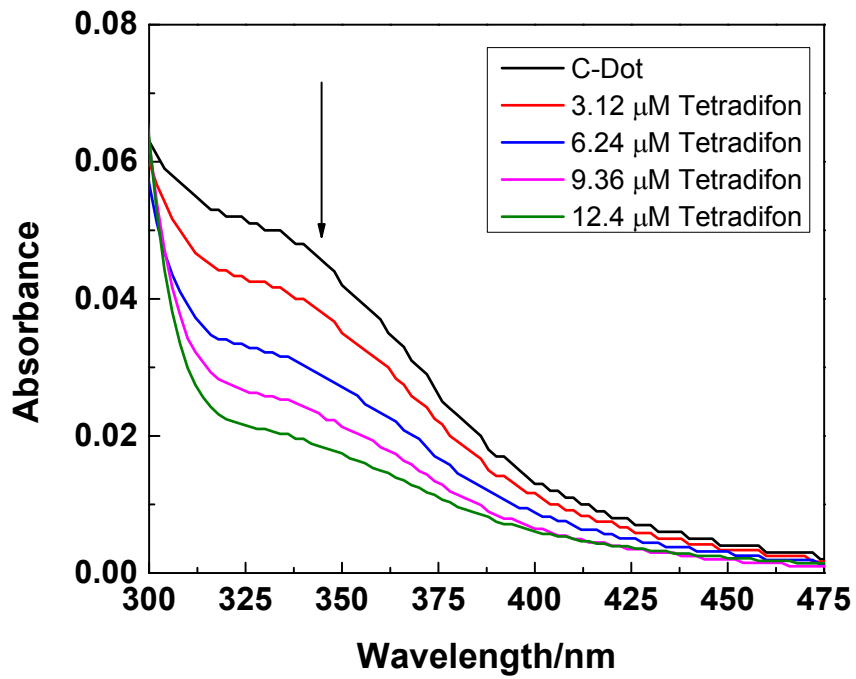

Fig.S3d

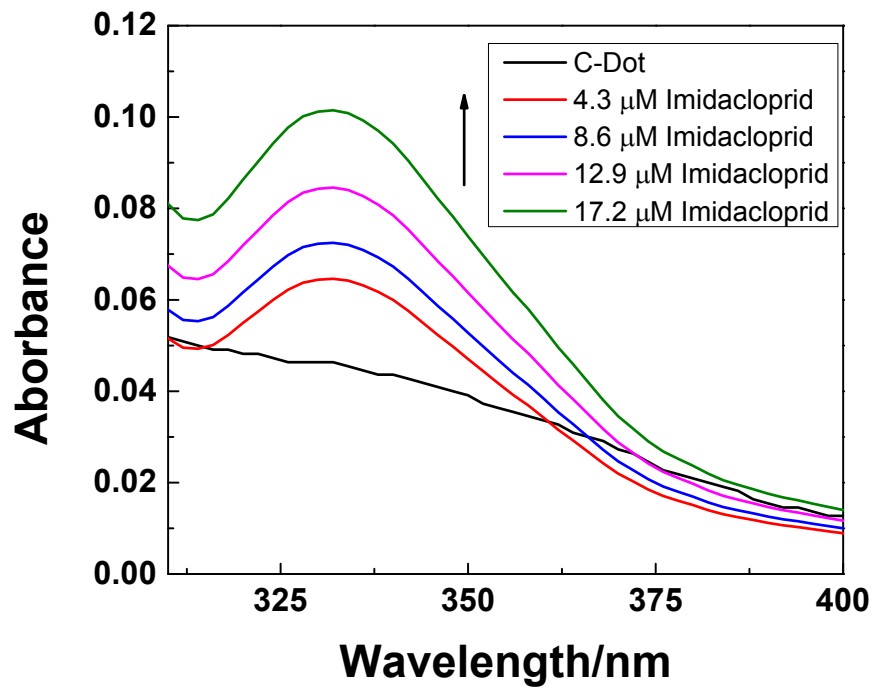

Fig.S3e

**Figure S3.** Absorbance spectra of C-Dots (Conc. ~ 0.1mg/ml) in the presence of increasing concentration of pesticides (a) Atrazine, (b) Chlorpyrifos, (c)Lindane , (d) Tetradifon , (e) Imidacloprid.

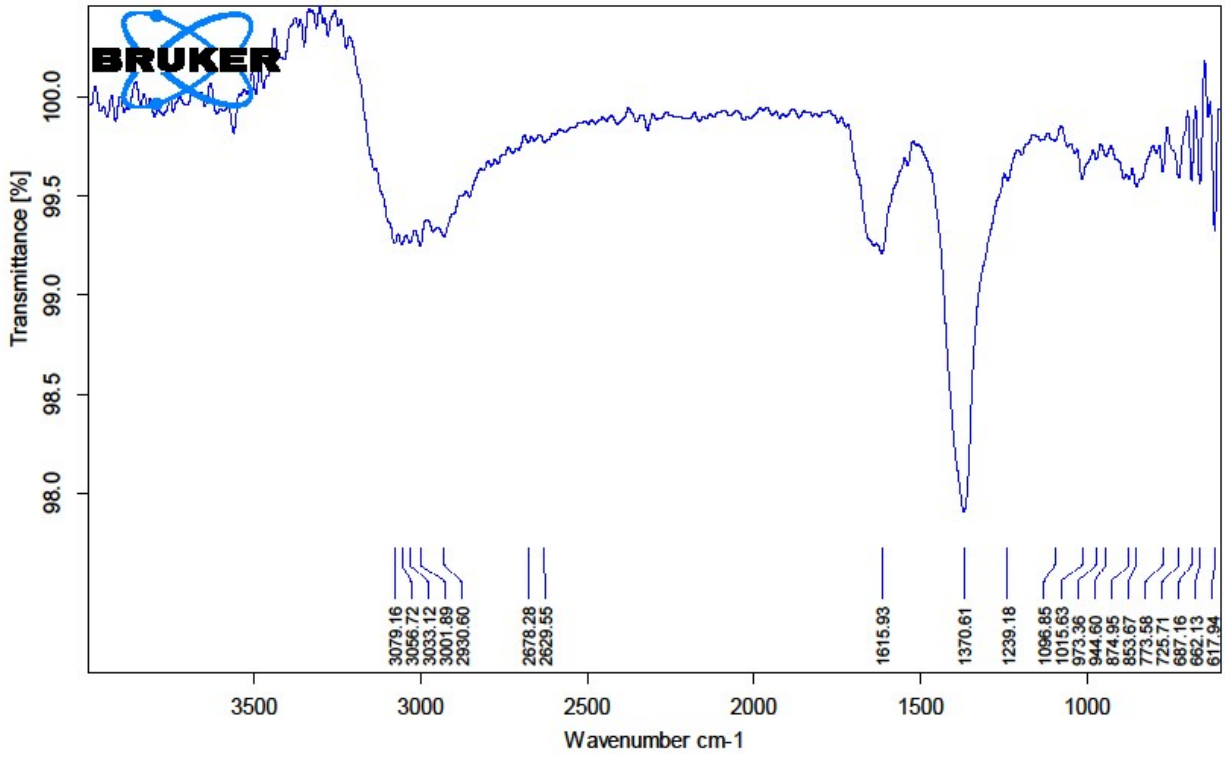

Fig.S4a

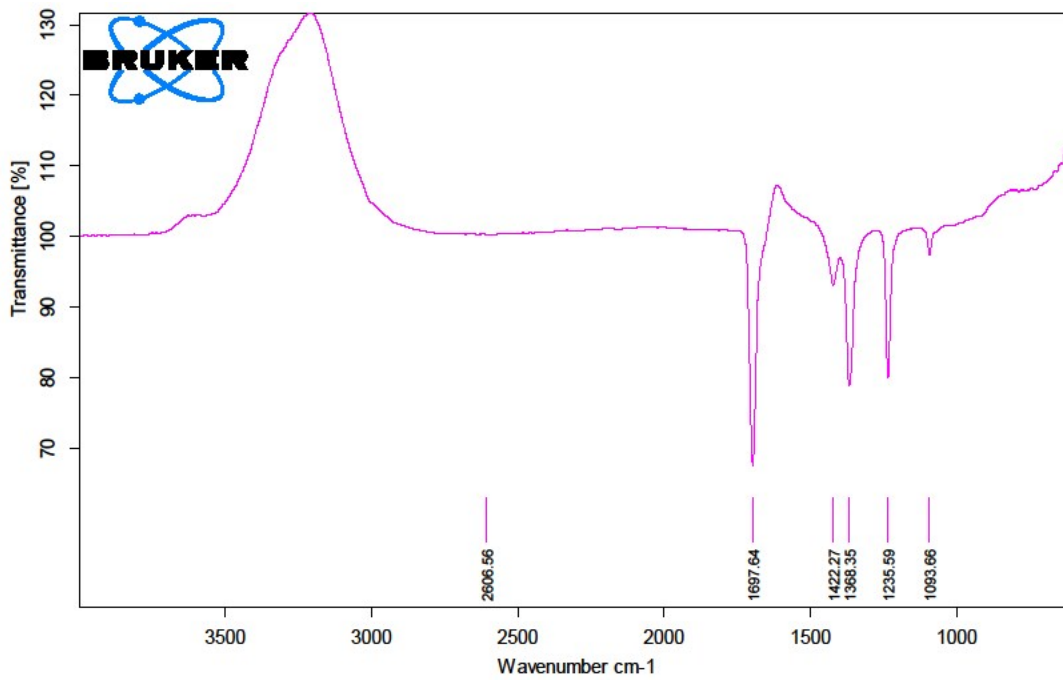

Fig.S4b

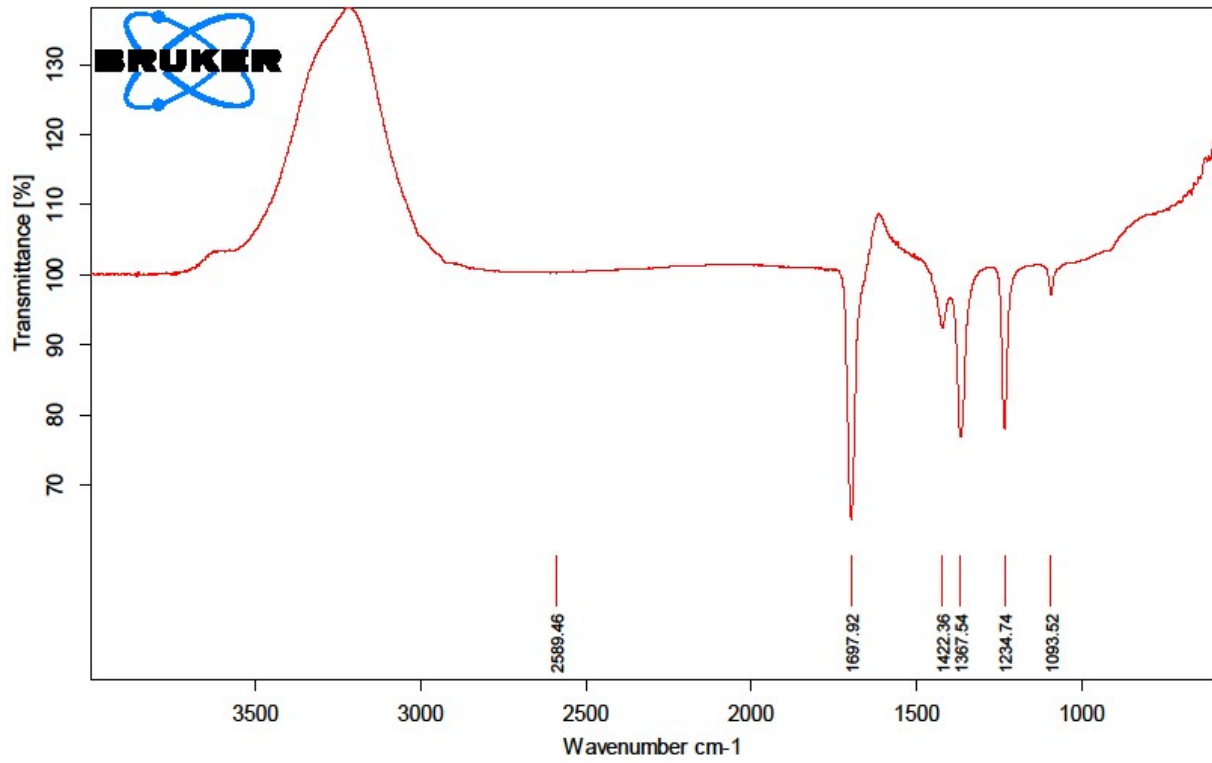

Fig.S4c

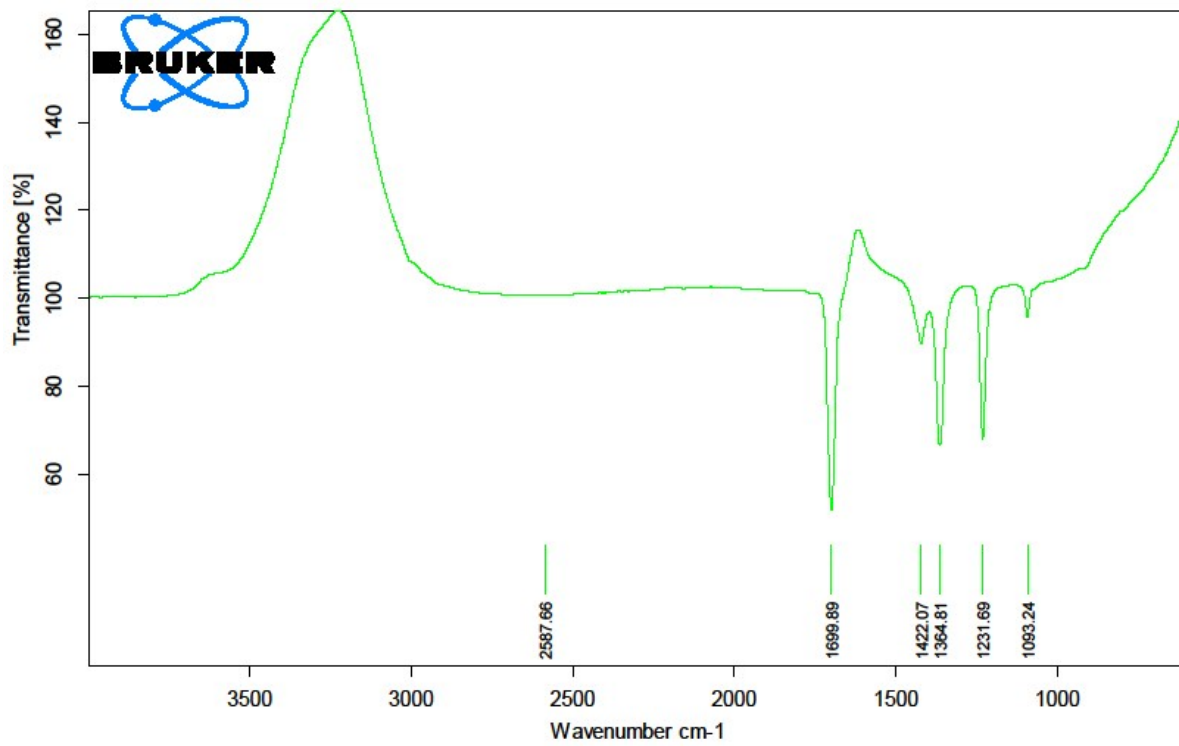

Fig.S4d



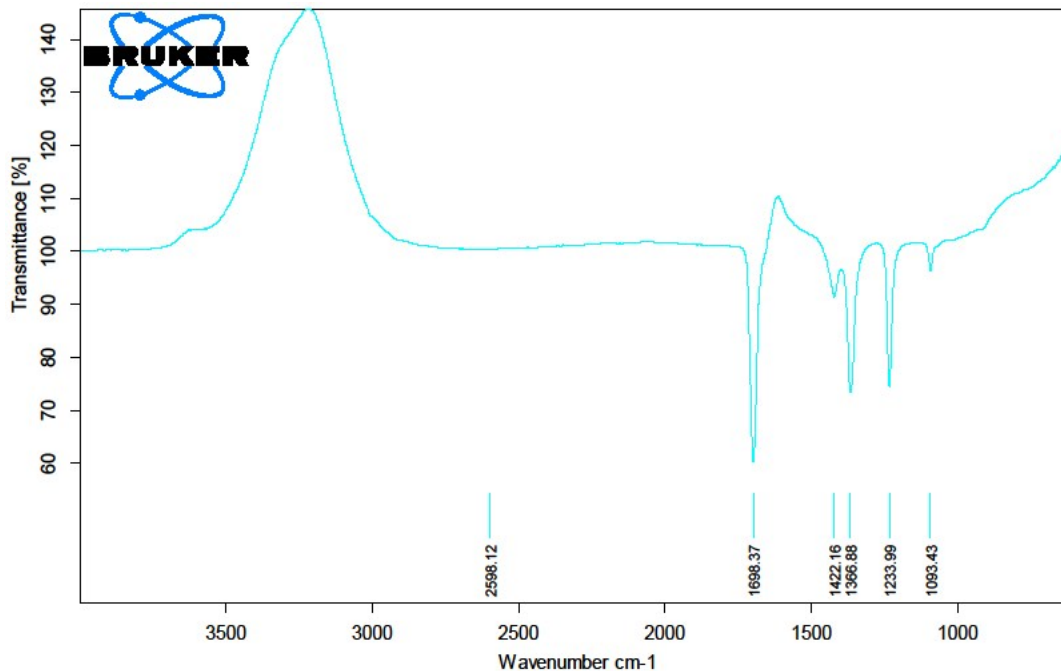

**Fig.S4e**

**Figure S4:** ATR spectra of as-synthesized C-Dots (a) before the addition of pesticides, after addition of (b) Imidacloprid, (c) Tetradifon, (d) Atrazine, (e) Lindane.

**Table S1.** Zeta potential values of C-Dots in the absence and presence of the 5 pesticides.

| Samples               | Zeta Potential (mV) |
|-----------------------|---------------------|
| C-Dots                | -16                 |
| C-Dots + Imidacloprid | -53                 |
| C-Dots + Tetradifon   | -41                 |
| C-Dots + Atrazine     | -25                 |
| C-Dots + Lindane      | -19                 |
| C-Dots + Chlorpyrifos | -21                 |

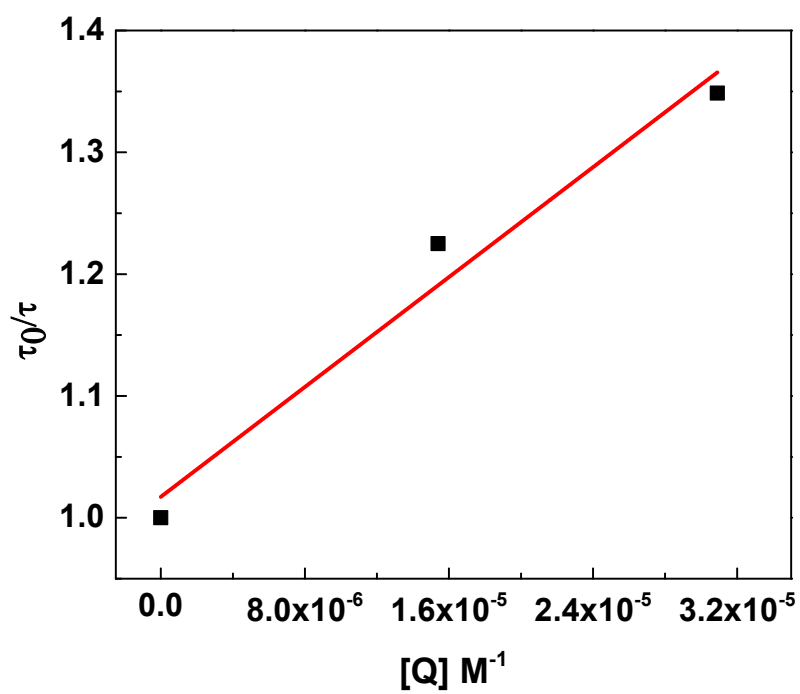

Fig.S5a

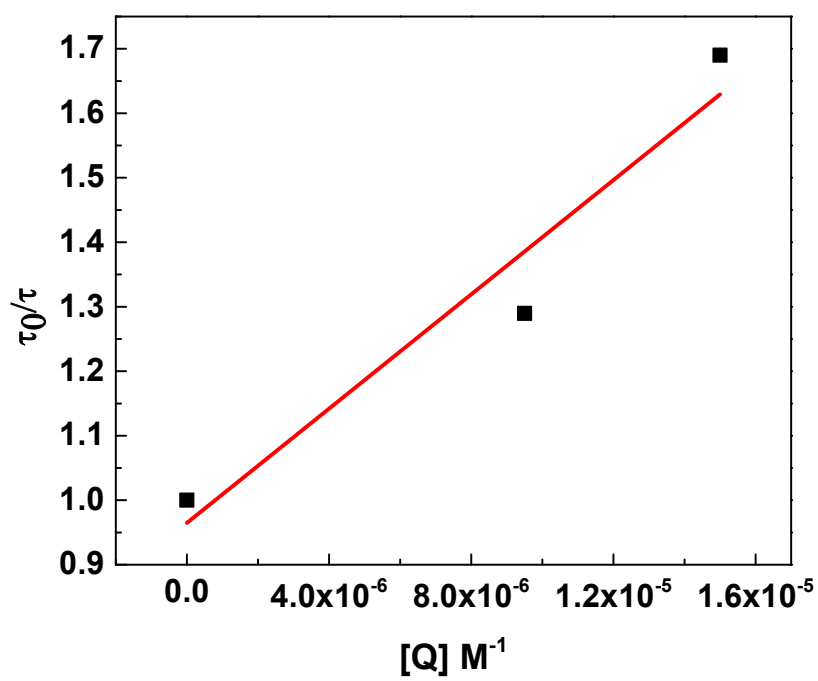

Fig.S5b

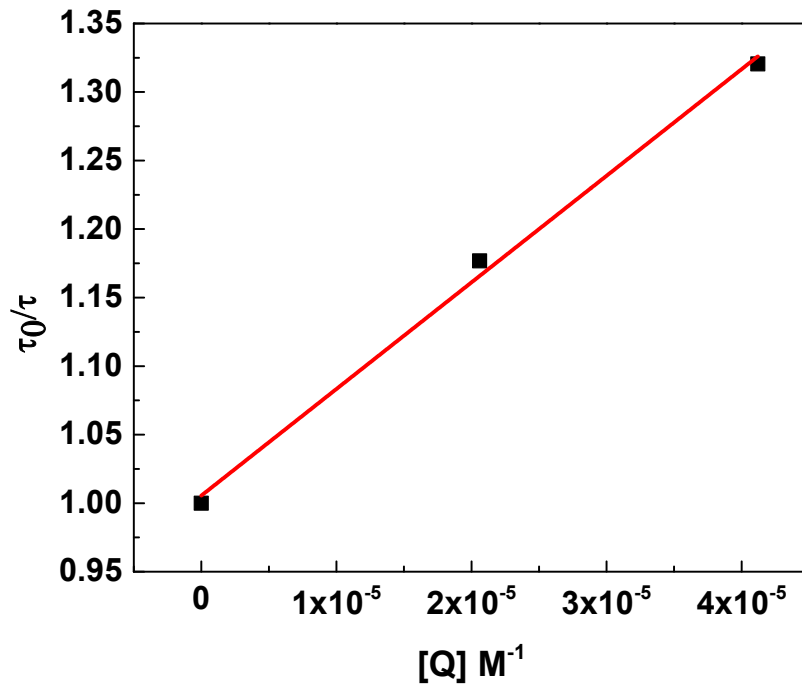

Fig.S5c

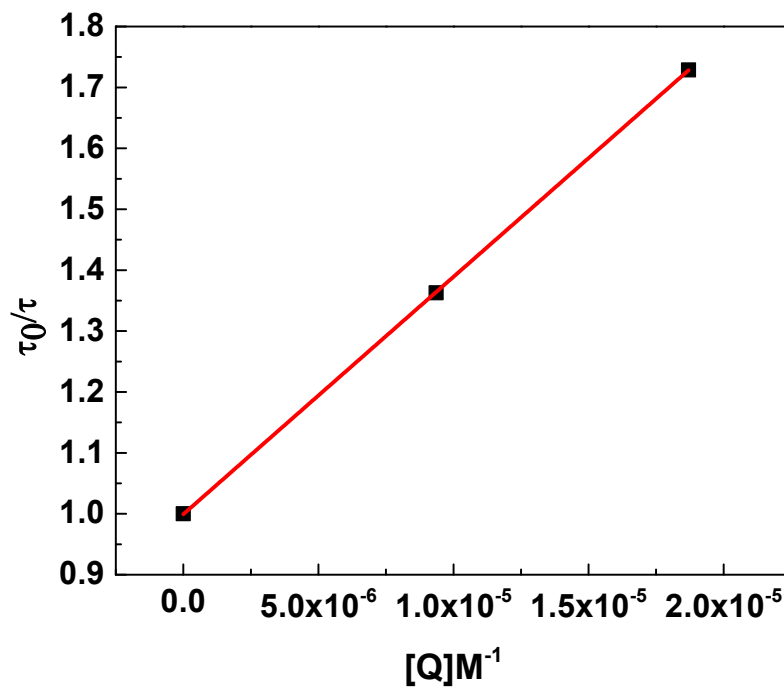

Fig.S5d

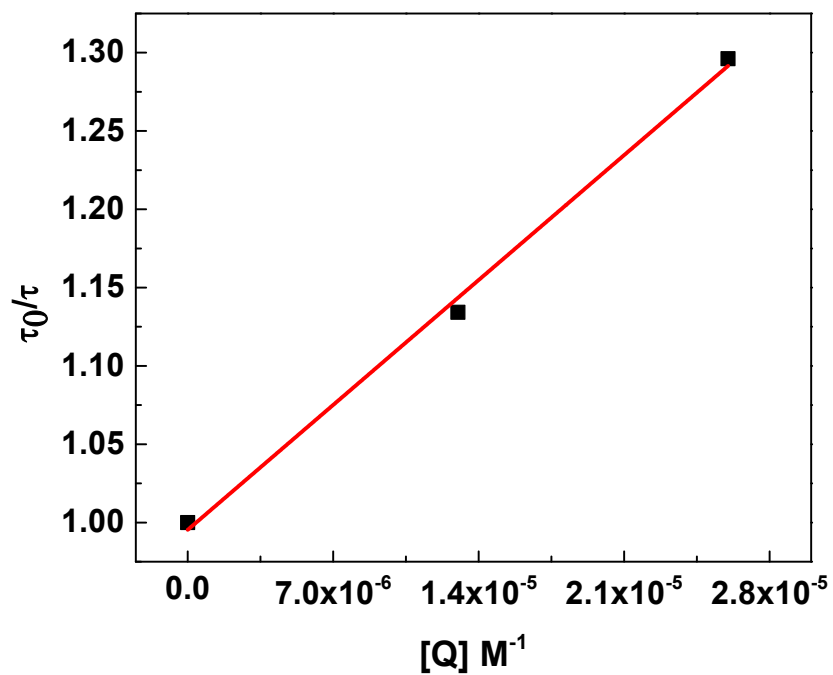

Fig.S5e

**Figure S5.** SV plots from time-resolved fluorescence lifetime decay for (a) Atrazine, (b) Chlorpyrifos, (c) Lindane, (d) Tetradifon and (e) Imidacloprid.

**Table S2.** The fluorescence lifetimes of C-Dots (Conc ~ 0.1mg/ml) in the absence and presence of different pesticides in the aqueous solution containing at the excitation at 330 nm and monitored at 457 nm.

| Samples<br>C-Dots+         | $\tau_1$ (ns) | $f_1$ | $\tau_2$ (ns) | $f_2$ | $\tau_3$ (ns) | $f_3$ | $\langle\tau\rangle$ ns | $\chi^2$ |
|----------------------------|---------------|-------|---------------|-------|---------------|-------|-------------------------|----------|
| C-Dots                     | 1.689         | 40.27 | 0.2469        | 30.21 | 6.1609        | 29.52 | 2.569                   | 1.24     |
| 15.4 $\mu$ M<br>Atrazine   | 1.620442      | 33.08 | 0.181688      | 41.57 | 6.365         | 23.35 | 2.097                   | 1.18     |
| 31 $\mu$ M<br>Atrazine     | 1.49627       | 27.42 | 0.123217      | 50.08 | 6.3661        | 22.51 | 1.9049                  | 1.23     |
| 10 $\mu$ M<br>Chlorpyrifos | 1.4885        | 30.98 | 0.14213       | 44.62 | 6.0139        | 24.40 | 1.992                   | 1.25     |
| 15 $\mu$ M<br>Chlorpyrifos | 1.4813        | 24.40 | 0.09205       | 57.95 | 6.2924        | 17.65 | 1.5253                  | 1.19     |
| 13 $\mu$ M<br>Imidacloprid | 1.57968       | 35.29 | 0.1998        | 38.69 | 6.2659        | 26.02 | 2.2652                  | 1.21     |
| 26 $\mu$ M<br>Imidacloprid | 1.5484        | 30.06 | 0.14265       | 48.05 | 6.5714        | 21.90 | 1.9824                  | 1.15     |
| 20.6 $\mu$ M<br>Lindane    | 1.555         | 32.86 | 0.171322      | 41.57 | 6.2615        | 25.57 | 2.1832                  | 1.389    |
| 41.2 $\mu$ M<br>Lindane    | 1.5114        | 29.69 | 0.12895       | 48.05 | 6.44305       | 22.27 | 1.9455                  | 1.3      |
| 9.4 $\mu$ M<br>Tetradifon  | 1.4392        | 28.31 | 0.12838       | 47.82 | 5.9318        | 23.88 | 1.8853                  | 1.19     |
| 18.7<br>Tetradifon         | 1.5377        | 21.76 | 0.09707       | 61.15 | 6.3916        | 17.09 | 1.486                   | 1.13     |

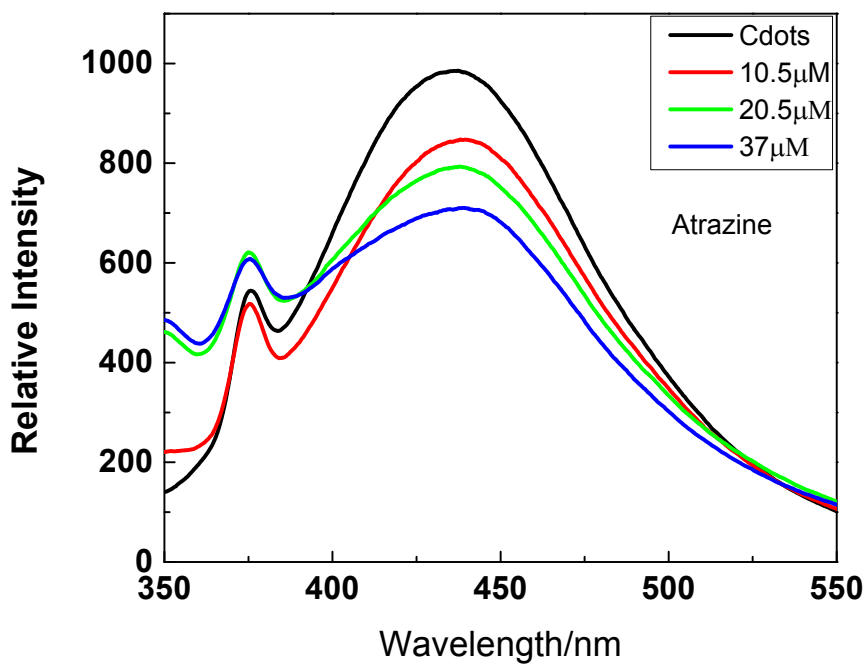

Fig.S6a

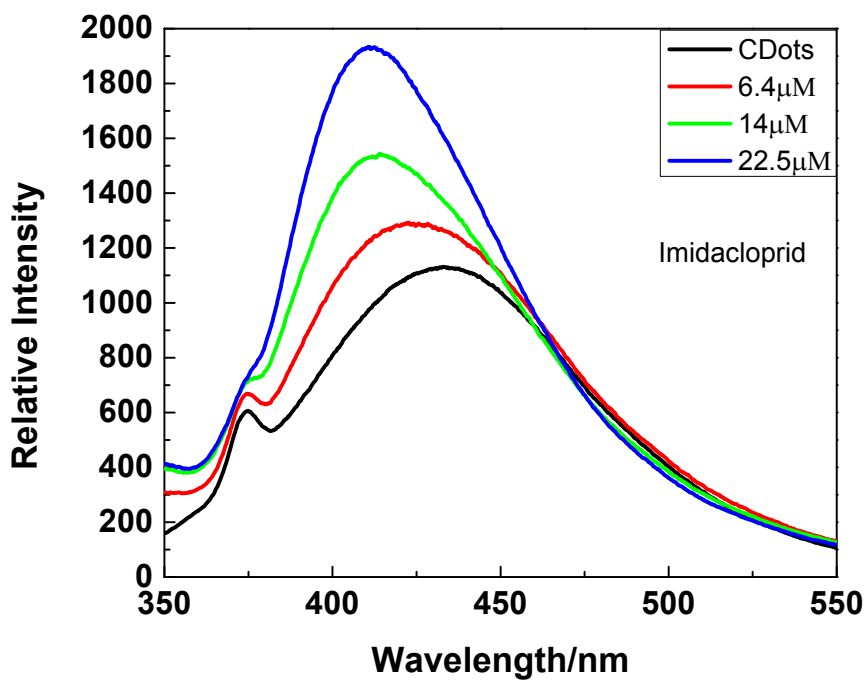

Fig.S6b

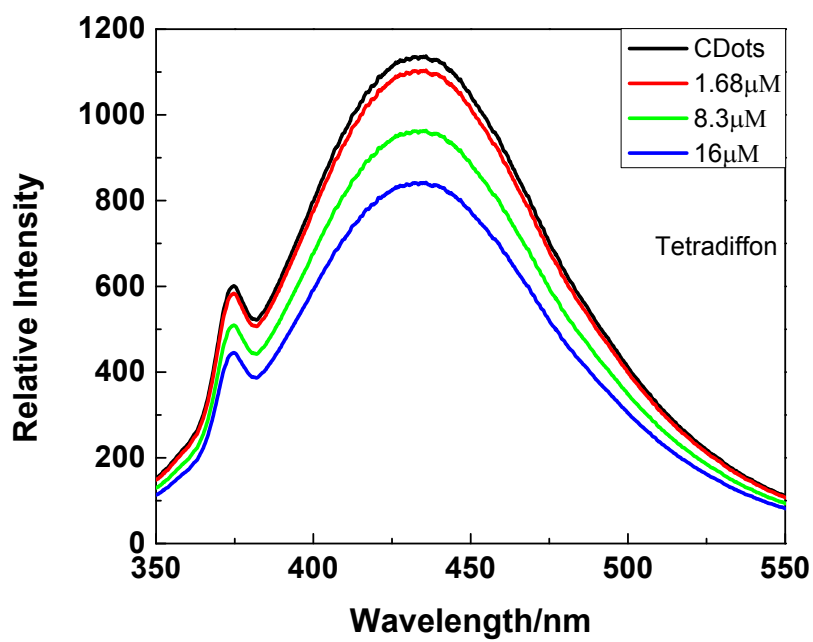

Fig.S6c

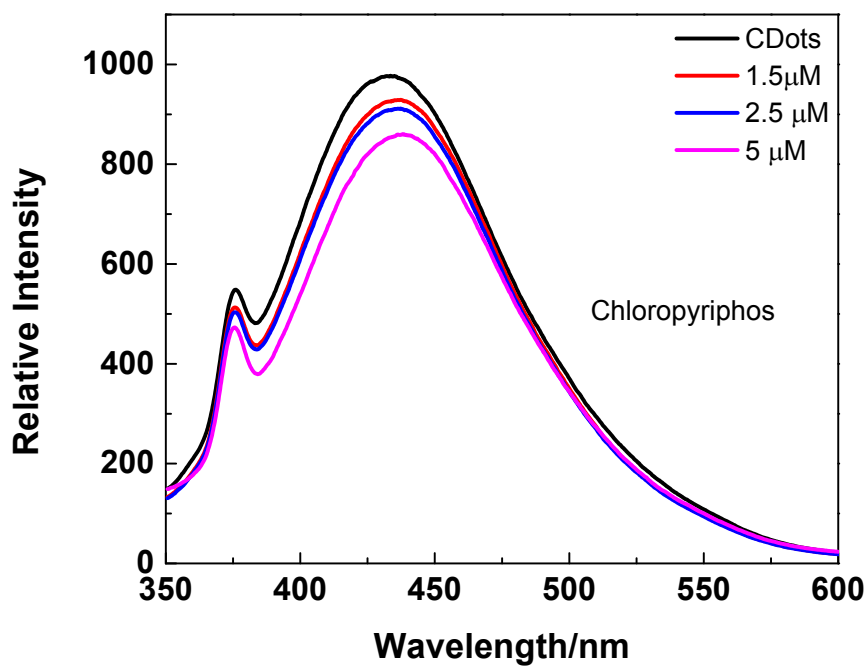

Fig.S6d

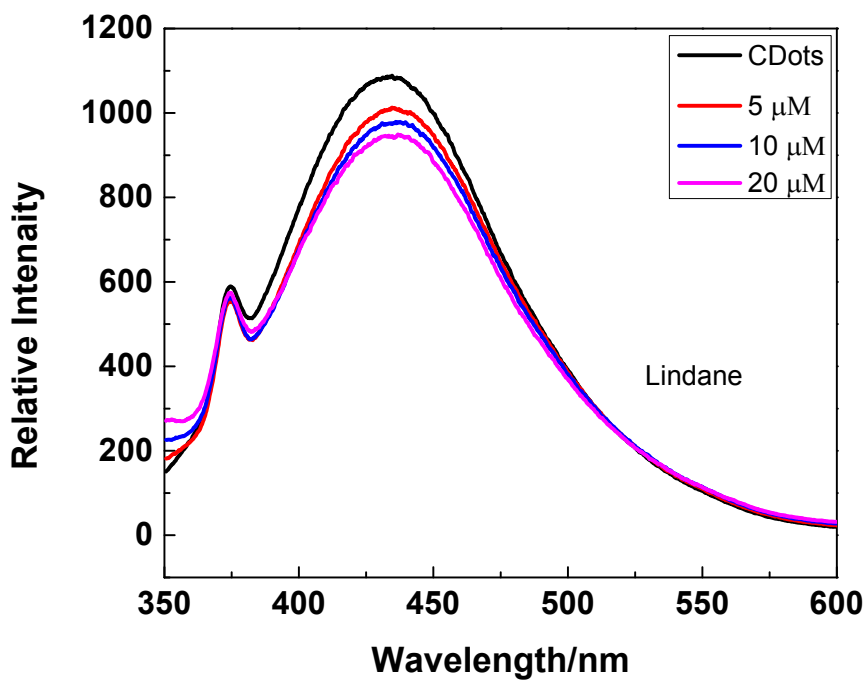

Fig.S6e

**Figure S6:** Fluorescence response of C-Dots towards (a) Atrazine, (b) Imidacloprid and (c) Tetradiflon, (d) Chlorpyrifos and (e) Lindane in river water.
